# Supplementary material for: Enhancement of osteoporotic bone regeneration by strontium-substituted 45S5 bioglassviatime-dependent modulation of autophagy and the Akt/mTOR signaling pathway
Source: Royal Society of Chemistry journal article supplement (doi:10.1039/d0tb02991b), 2021-01-01
Supplement: d0tb02991b1.pdf [file d0tb02991b1.pdf]

## Supplementary Information

### Enhancement of osteoporotic bone regeneration by strontium-substituted 45S5 bioglass via time-dependent modulation of autophagy and Akt/mTOR signaling pathway

Xinran Zhang,<sup>a,b,#</sup> Jinjie Cui,<sup>a,#</sup> Liming Cheng,<sup>c,d,\*</sup> Kaili Lin<sup>a,\*</sup>

<sup>a</sup>. Department of Oral and Cranio-maxillofacial Science, Shanghai Ninth People's Hospital, College of Stomatology, Shanghai Jiao Tong University School of Medicine; National Clinical Research Center for Oral Diseases; Shanghai Key Laboratory of Stomatology & Shanghai Research Institute of Stomatology, Shanghai 200011, China.

<sup>b</sup>. School & Hospital of Stomatology, Tongji University, Shanghai Engineering Research Center of Tooth Restoration and Regeneration, Shanghai 200072, China.

<sup>c</sup>. Department of Spine Surgery, Tongji Hospital, Tongji University School of Medicine, Shanghai 200065, China.

<sup>d</sup>. Key Laboratory of spine and spinal cord injury repair and regeneration (Tongji University), Ministry of Education, Shanghai, China

<sup>#</sup>Those authors contributed equally to this study.

\*Corresponding author: Tel:86-21-23272699; Fax: 86-21-63136856.

E-mail: [lklecnu@aliyun.com](mailto:lklecnu@aliyun.com) (K. Lin); [limingcheng@tongji.edu.cn](mailto:limingcheng@tongji.edu.cn) (L. Cheng).

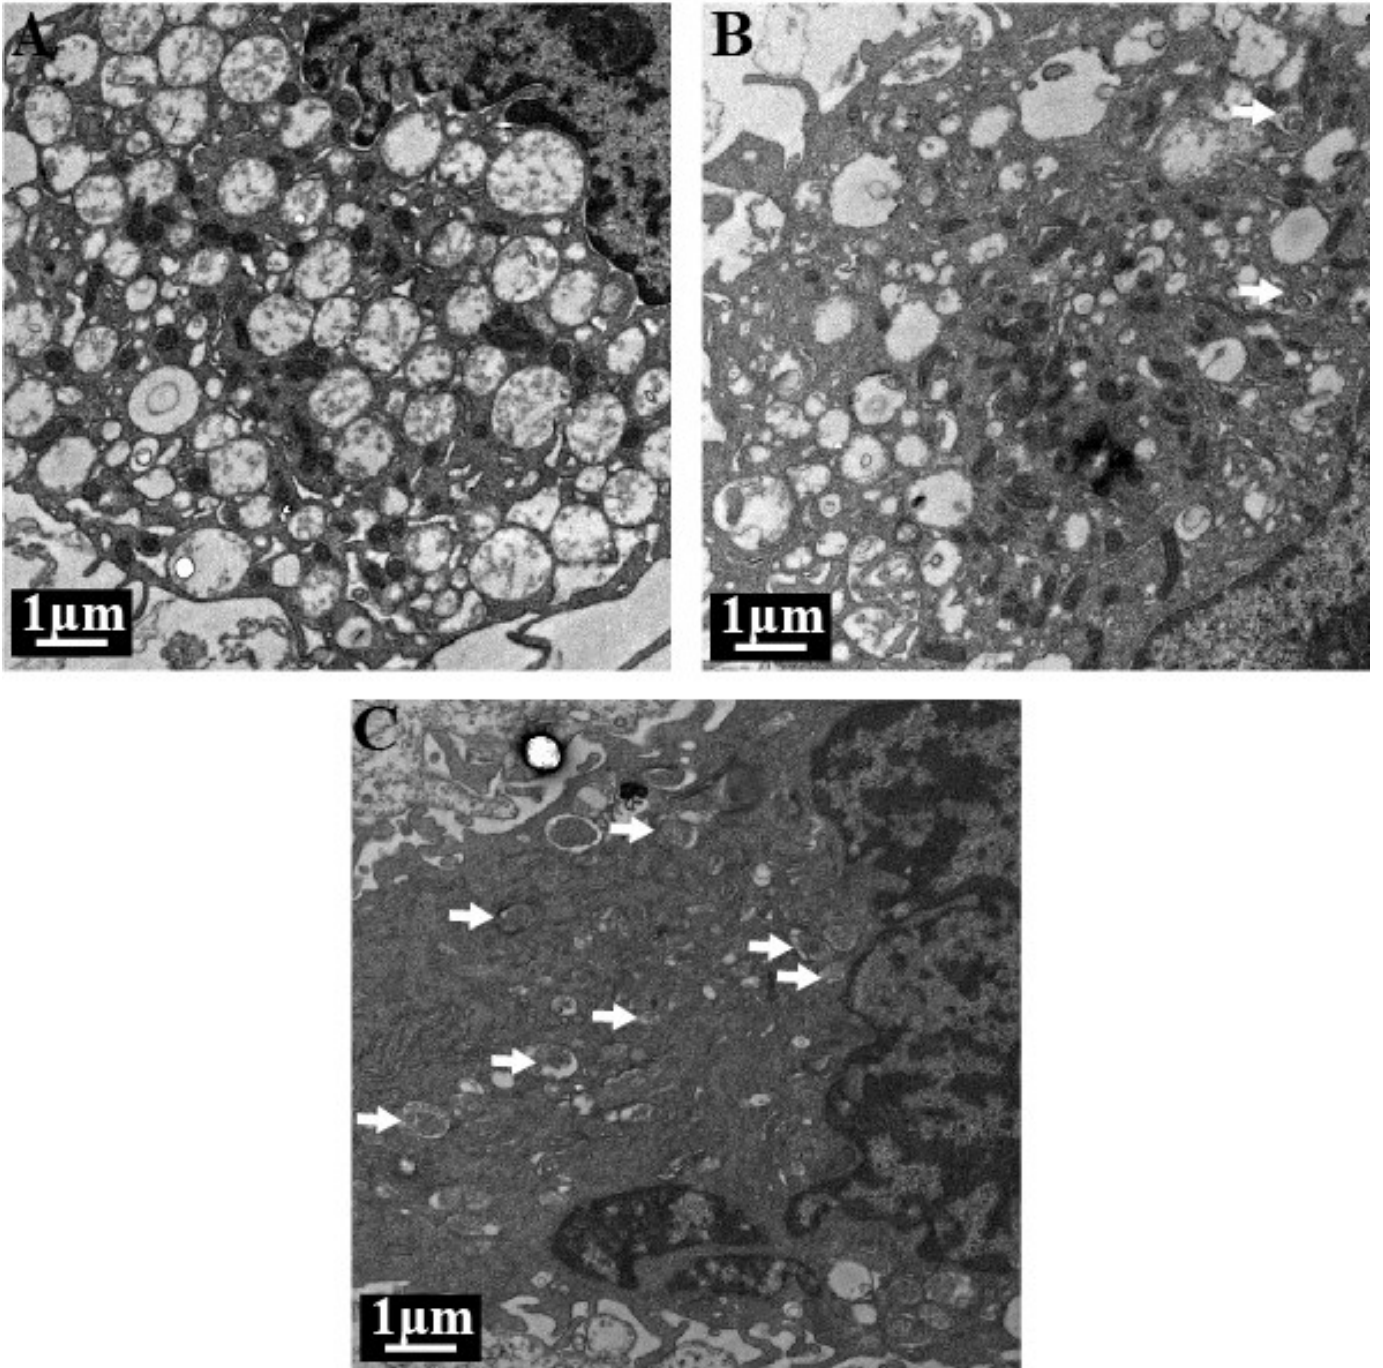

Fig. S1. TEM images of OVX-BMSCs cultured in the optimal concentration (1/16) of  $\beta$ -TCP (A), 45S5 (B), Sr10/45S5 (C) granule extract at day 1 (white arrows point autophagic vacuoles).
